# Supplementary material for: Histone regulator KAT2A acts as a potential biomarker related to tumor microenvironment and prognosis of diffuse large B cell lymphoma
Source: Springer Nature journal article supplement (doi:10.1186/s12885-023-11401-4), 2023-10-03

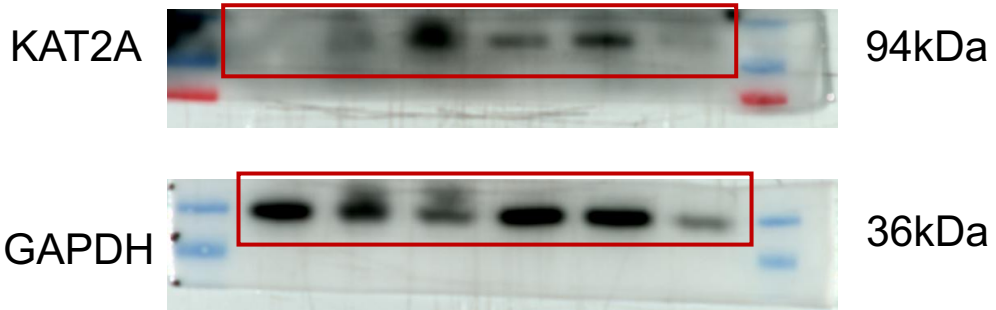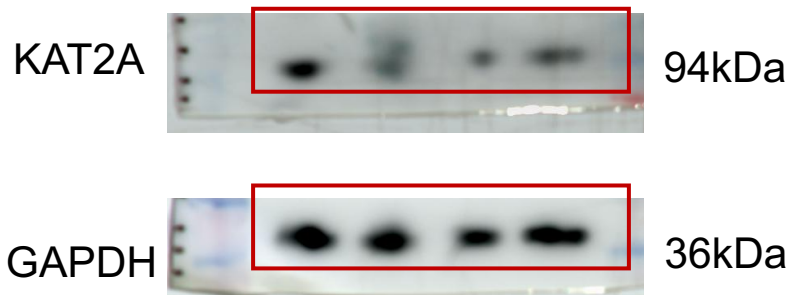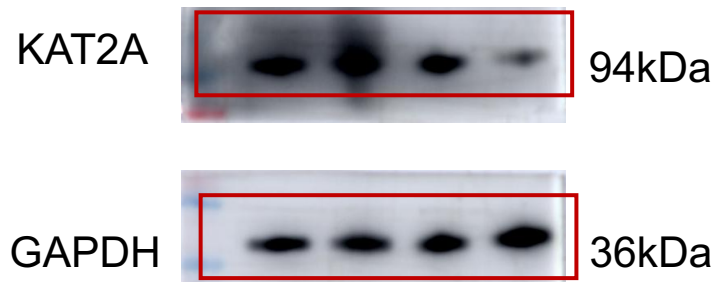

Supplement: MOESM2 [file 26120334]
